# Supplementary material
Source: PubMed Central journal article supplement (PMC6904927)
Supplement: NIHMS1060566-supplement-Supplementary_Fig_1.pdf [file NIHMS1060566-supplement-Supplementary_Fig_1.pdf]

# Supplementary data

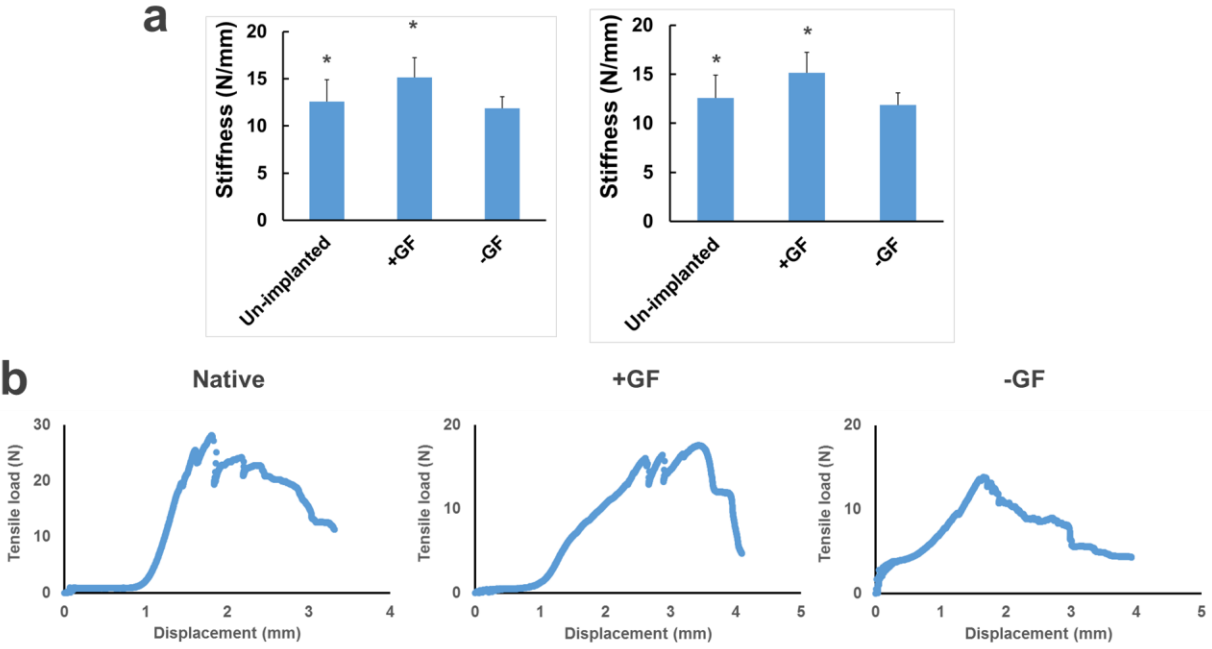

**Supplementary Figure 1.** Tensile properties of un-implanted scaffolds as compared to +GF and -GF scaffolds harvested after 4 weeks in vivo (**a**) (n = 4 per group; \*:p<0.05 compared to all the other groups). Representative tensile curves of native tendon enthesis, +GF and -GF constructs after 4 weeks in vivo (**b**).
